# Supplementary material
Source: MDPI journal article supplement (https://www.mdpi.com/2072-4292/14/3/454)
Supplement: s1 [file s1 › remotesensing-1504334-supplementary.pdf]

## Supplementary Information:

**Figure S1.** Structure-from-Motion derived pointclouds. a) shows the orthomosaic produced in the Pix4D software b) derived digital elevation model (DEM) from the pointcloud and c) shows the reference for overlapping images in each scene.

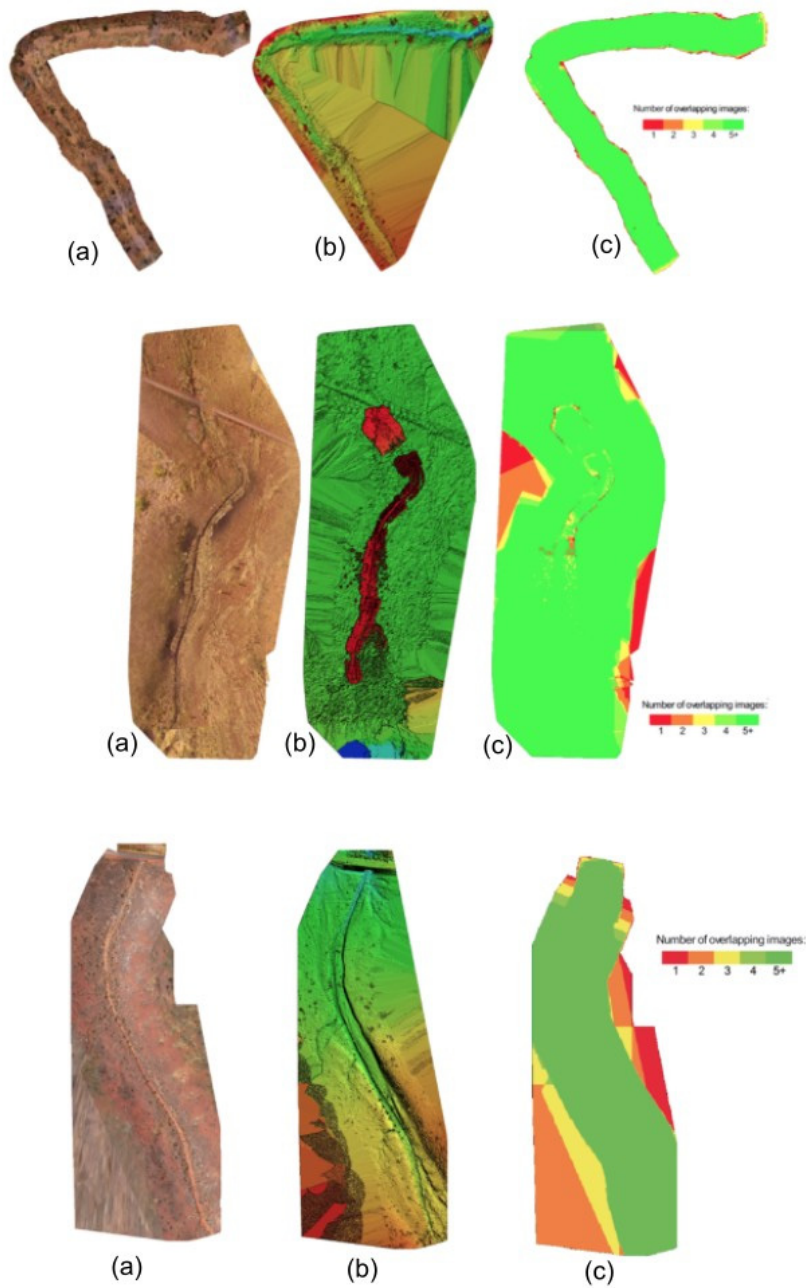

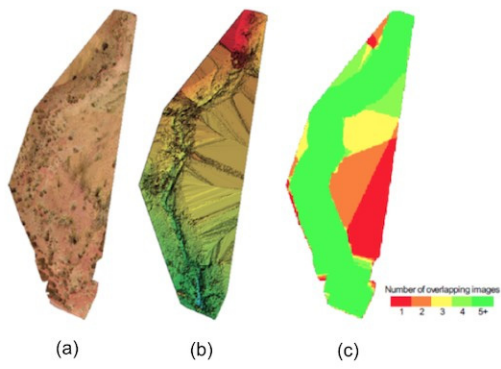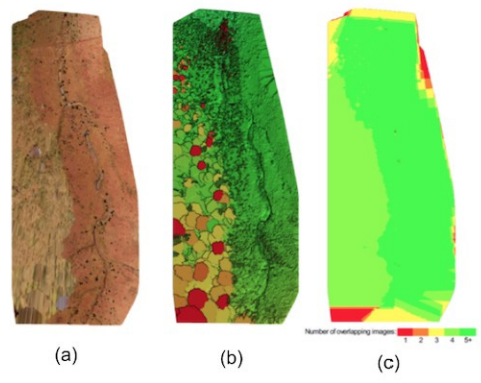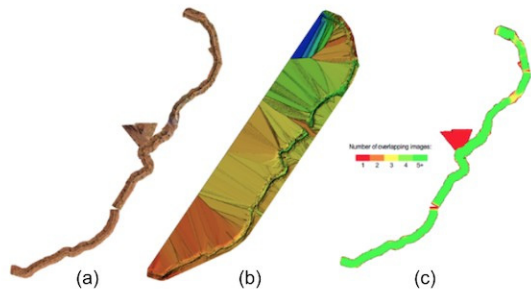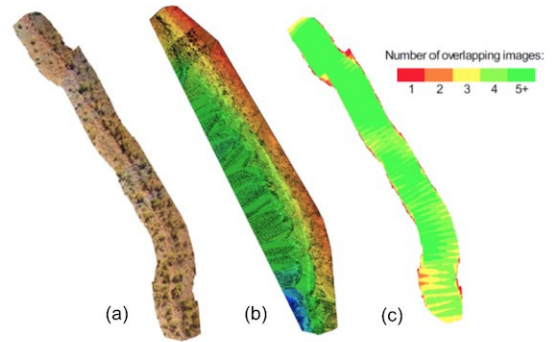

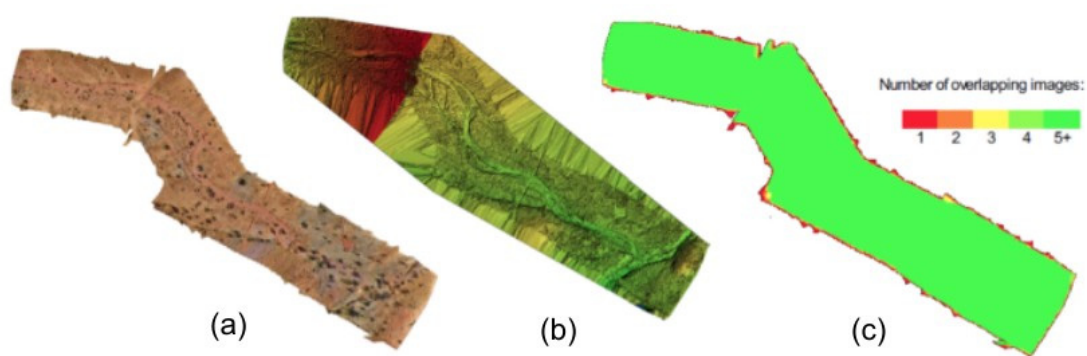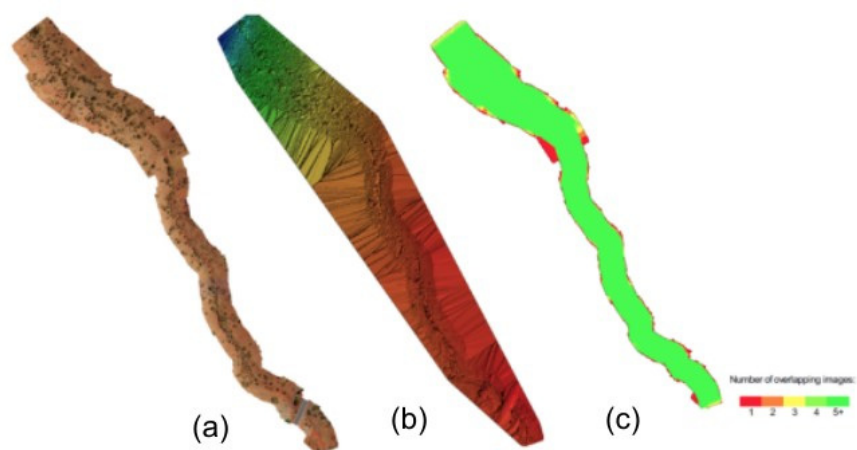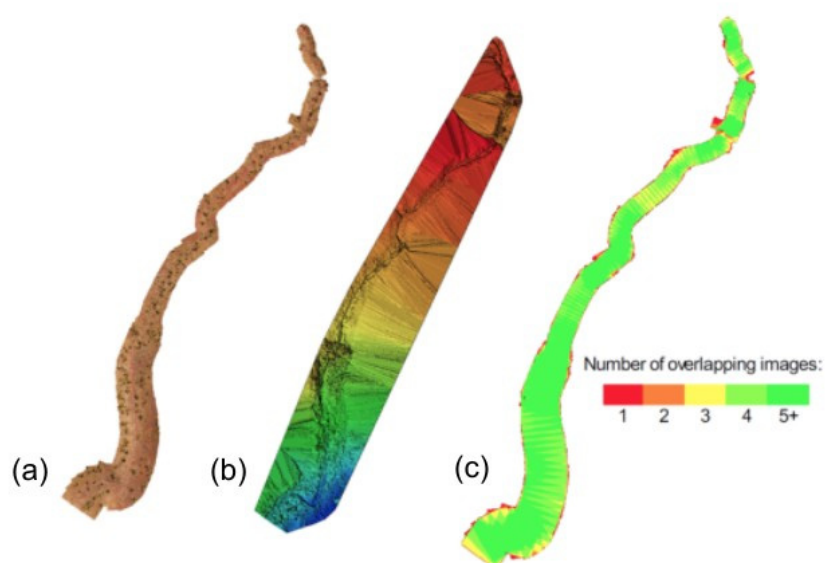

**Figure S2.** Illustration showing the pointcloud processing steps for the estimation of channel boundary roughness (using Limerinos, 1970) and the contribution of riparian vegetation, using an equation from (Petryk and Bosmajian, 1975).

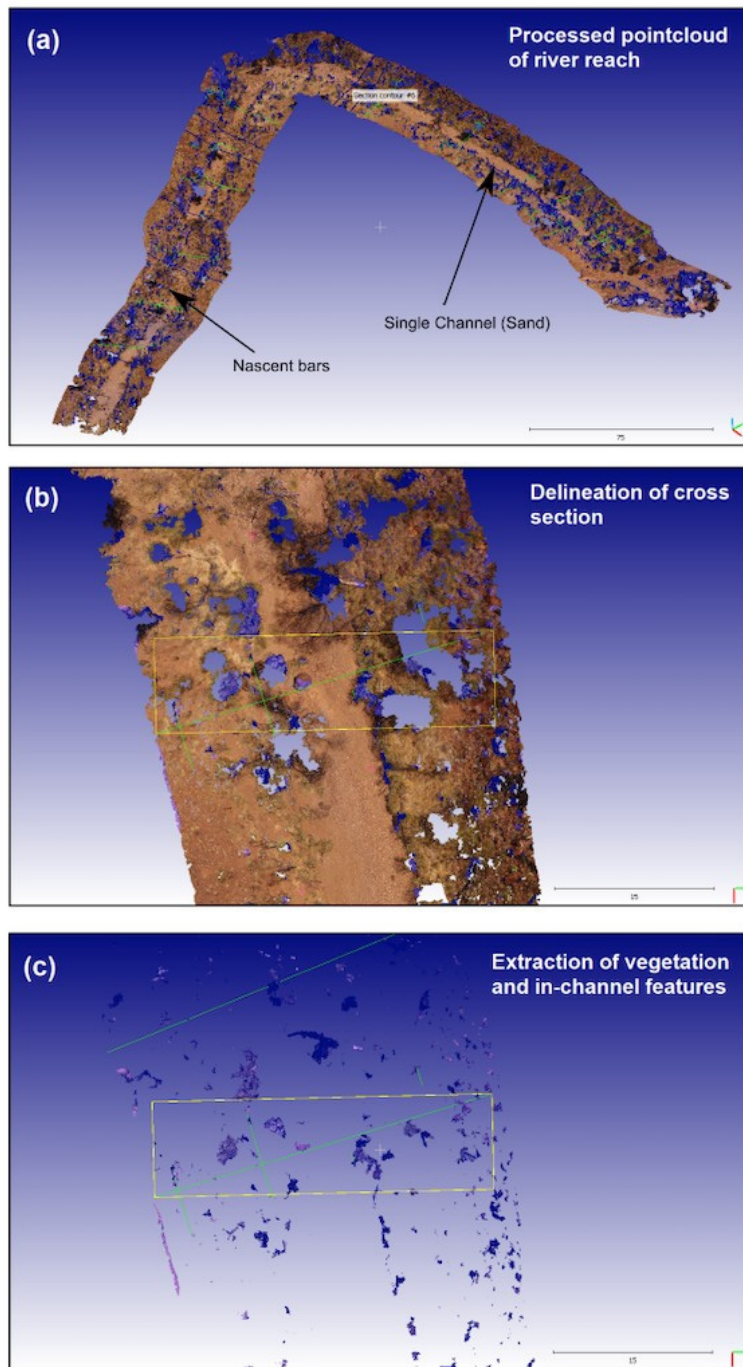

**Figure S3.** Example of the process of calculating  $A_i$ , (streamwise projected area of the plant) using the pointpicking tool in Cloudcompare. Yellow triangles show triangulated area calculations to derive submerged plant area at bankfull.

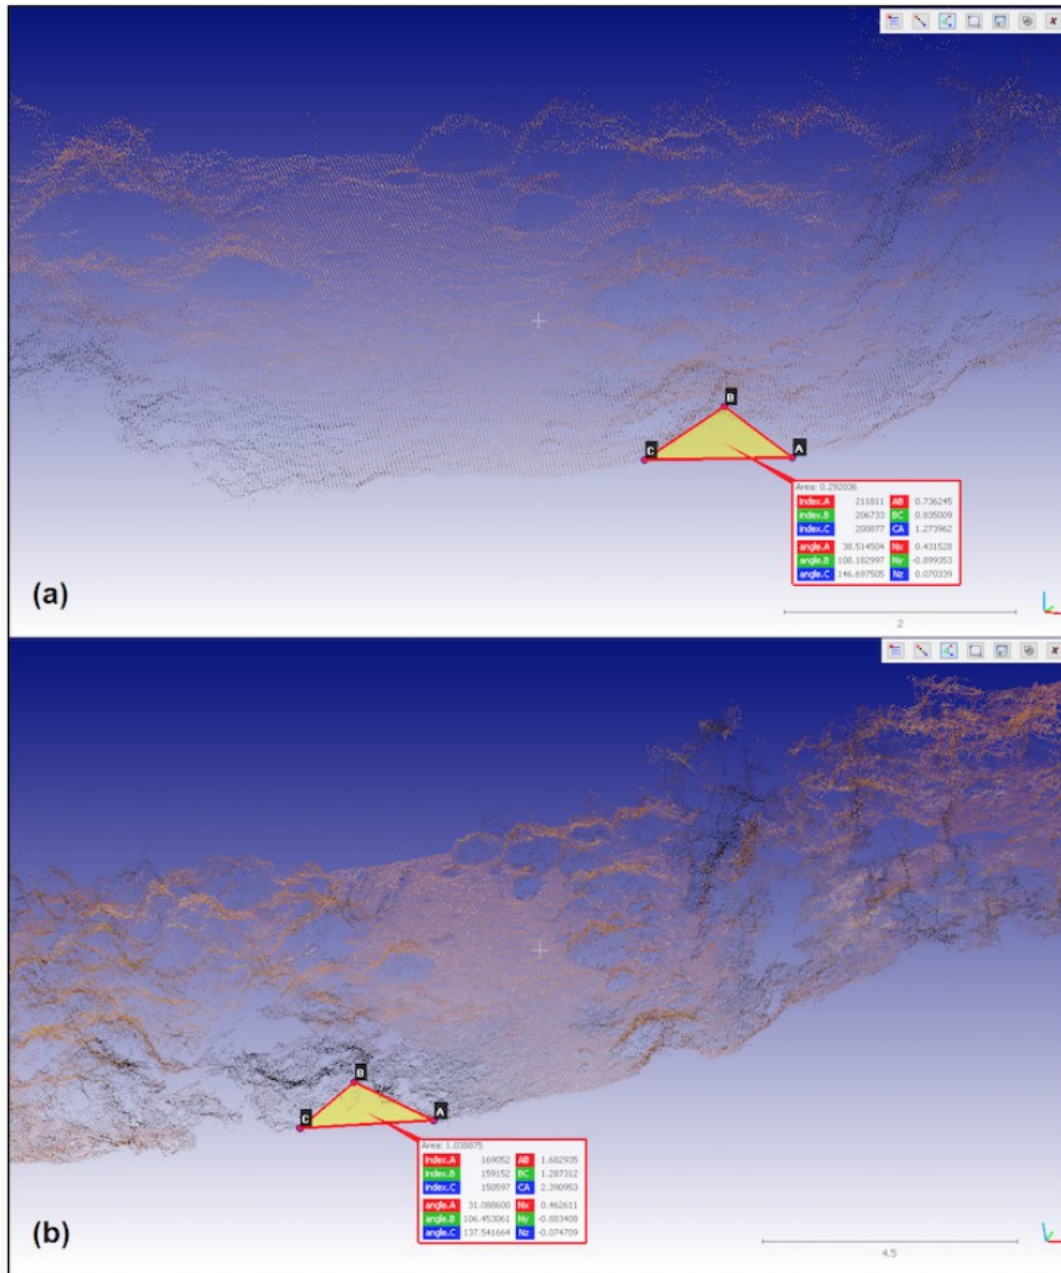

## Results of calculating $A_i$ (streamwise projected area of plant).

**Table S1.** Calculation of  $A_i$ , the streamwise projected area of plants lying below the water surface (at bankfull). The symbol \* denotes where  $A_i$  have been added together in channels with dense vegetation.

| Cross Section   | $A_{i1}$ | $A_{i2}$ | $A_{i3}$ | $A_{i4}$ | $A_{i5}$ | $A_{i6}$ |
|-----------------|----------|----------|----------|----------|----------|----------|
| Ampthi-XS1      | 4.086    | 4.572    | 1.150    | 0.365    | -        | -        |
| Ampthi-XS2      | 0.785    | 0.435    | 0.161    | 0.208    | -        | -        |
| Ampthi-XS3      | 1.730    | 0.560    | 0.269    | 0.264    | 0.325    | 0.479*   |
| Ampthi-XS4      | 2.804    | 0.916    | -        | -        | -        | -        |
| Ampthi-XS5      | 0.158    | 0.287    | 0.431    | 0.189    | -        | -        |
| Burnt-XS1       | 0.5621   | 0.4632   | 0.2823   | 0.02258  | -        | -        |
| Burnt-XS2       | 0.417    | 0.231    | 0.041    | 0.0926   | 0.0505   | 0.232    |
| Burnt-XS3       | 0.044    | 0.086    | 0.2968   | 0.3284   | 0.3284   | 0.3515   |
| Burnt-XS4       | 0.4128   | 0.1434   | 0.3313   | -        | -        | -        |
| Burnt-XS5       | 0.0239   | 0.02148  | 0.124    | 0.1008   | -        | -        |
| Homestead-XS1   | 0.502    | 0.256    | 0.540    | 0.110    | 1.127    | *3.362   |
| Homestead-XS2   | 0.245    | 0.170    | 0.438    | 2.590    | 0.116    | 0.498    |
| Homestead-XS3   | 0.287    | 2.288    | 1.246    | 0.565    | 2.580    | -        |
| Homestead-XS4   | 0.823    | 0.302    | 0.385    | -        | -        | -        |
| Homestead-XS5   | 0.135    | 1.004    | 0.862    | 0.275    | 0.283    | -        |
| Homestead-XS6   | 0.077    | 0.080    | 0.067    | 0.305    | 0.266    | -        |
| Homestead-XS7   | 0.347    | 0.0454   | 0.516    | -        | -        | -        |
| Karijini-XS1    | 0.230    | 0.091    | 0.207    | 0.031    | 0.188    | 1.097*   |
| Karijini-XS2    | 0.325    | 0.430    | 0.072    | 0.134    | 0.421    | 0.599*   |
| Karijini-XS3    | 0.234    | 1.845    | 1.293    | 0.714    | 0.236    | 1.441    |
| Robinson1-XS1   | 0.789    | 2.62     | -        | -        | -        | -        |
| Robinson1-XS2   | 0.7127   | -        | -        | -        | -        | -        |
| Robinson1-XS3   | 1.155    | 0.232    | 0.018    | 0.182    | 0.059    | 0.1325   |
| Robinson1-XS4   | 0.954    | 0.1579   | 0.199    | 0.0578   | 0.8731   | 1.6001   |
| Robinson1-XS5   | 2.6495   | -        | -        | -        | -        | -        |
| Robinson1-XS6   | 2.1502   | 0.594    | 0.2118   | -        | -        | -        |
| Robinson2-XS1   | 0.315    | 0.059    | 0.606    | 0.088    | -        | -        |
| Robinson2-XS2   | 0.461    | 0.034    | 0.191    | -        | -        | -        |
| Robinson2-XS3   | 0.165    | 0.286    | 0.613    | -        | -        | -        |
| Robinson2-XS4   | 0.371    | 0.173    | 0.251    | 0.193    | 0.164    | 0.353*   |
| Robinson2-XS5   | 0.494    | 0.126    | -        | -        | -        | -        |
| Robinson2-XS6   | 0.318    | 0.168    | 0.163    | 0.099    | 0.082    | 0.441*   |
| Ronnie-XS1      | 0.180    | 0.424    | 0.261    | 0.439    | 0.291    | -        |
| Ronnie-XS2      | 2.036    | 0.286    | 0.512    | 0.749    | 0.505    | 0.384    |
| Ronnie-XS3      | 0.260    | 0.226    | 0.752    | 0.439    | 0.144    | -        |
| Ronnie-XS4      | 2.506    | 0.300    | 0.498    | 0.117    | 0.300    | -        |
| Ronnie-XS5      | 0.111    | 0.246    | 1.022    | 0.298    | -        | -        |
| Meekatharra-XS1 | 2.6      | 0.552    | 0.429    | 0.1172   | 0.0355   | 0.993    |
| Meekatharra-XS2 | 0.349    | 0.204    | 0.635    | 0.115    | -        | -        |
| Meekatharra-XS3 | 0.245    | 0.135    | 0.376    | -        | -        | -        |
| Meekatharra-XS4 | 0.220    | 0.048    | 0.225    | -        | -        | -        |
| Meekatharra-XS5 | 0.774    | 0.208    | 0.162    | 0.525    | -        | -        |

**Table S2.** Description of SfM derived vegetation cross sections.

| Channel XS     | Channel Type                                | Vegetation description      | Change %  |
|----------------|---------------------------------------------|-----------------------------|-----------|
| Amp XS 1       | Confined, alluvial, barform                 | Shrubs, nascent bars, sand  | +47.93%   |
| Amp XS 2       | Confined, alluvial sand                     | Sand, shrubs                | +36.43%   |
| Amp XS 3       | Semi-confined, alluvial sand                | LWD, shrubs                 | +47.84%   |
| Amp XS 4       | Semi-confined, alluvial sand                | Shrubs                      | +37.01%   |
| Amp XS 5       | Semi-confined alluvial barform              | Shrubs and nascent barforms | +38.266%  |
| Burnt XS 1     | Unconfined alluvial barform                 | Shrubs, trees               | +40.09%   |
| Burnt XS 2     | Unconfined alluvial barform                 | Shrubs                      | +37.87%   |
| Burnt XS 3     | Unconfined alluvial ( $\geq$ cobble)        | Shrubs, trees               | +36.41%   |
| Burnt XS 4     | Unconfined alluvial ( $\geq$ cobble)        | Shrubs                      | +36.96%   |
| Burnt XS 5     | Unconfined alluvial ( $\geq$ cobble)        | Shrubs                      | +35.40%   |
| HS XS 1        | Unconfined alluvial single ( $\geq$ cobble) | Shrubs, trees               | +37.78%   |
| HS XS 2        | Unconfined alluvial single ( $\geq$ cobble) | Shrubs, trees               | +36.10%   |
| HS XS 3        | Unconfined alluvial single ( $\geq$ cobble) | Shrubs, trees               | +40.16%   |
| HS XS 4        | Unconfined alluvial islands                 | Shrubs, trees               | +35.36%   |
| HS XS 5        | Unconfined alluvial islands                 | Shrubs, trees               | +35.92%   |
| HS XS 6        | Unconfined alluvial single ( $\geq$ cobble) | Shrubs, trees               | +34.34%   |
| HS XS 7        | Unconfined alluvial single ( $\geq$ cobble) | Shrubs, trees               | +34.23%   |
| Karijini XS 1  | Unconfined alluvial single ( $\geq$ cobble) | Shrubs, trees               | +36.91%   |
| Karijini XS 2  | Unconfined alluvial barform                 | Shrubs, trees               | +36.20%   |
| Karijini XS 3  | Unconfined alluvial single ( $\geq$ cobble) | Shrubs                      | +43.41%   |
| Meek XS 1      | Alluvial sand barform                       | Shrubs and trees            | +109.703% |
| Meek XS 2      | Alluvial sand barform                       | Shrubs and trees            | +71.30%   |
| Meek XS 3      | Alluvial single (sand)                      | Shrubs                      | +52.703%  |
| Meek XS 4      | Alluvial single (sand)                      | Shrubs                      | +46.49%   |
| Meek XS 5      | Alluvial single (sand)                      | Shrubs and trees            | +113.36%  |
| Robinson1 XS 1 | Bedrock                                     | Shrubs, trees               | +36.37%   |
| Robinson1 XS 2 | Bedrock                                     | Shrubs, trees               | +34.47%   |
| Robinson1 XS 3 | Bedrock                                     | Shrubs                      | +37.31%   |
| Robinson1 XS 4 | Bedrock                                     | Shrubs, trees               | +36.87%   |
| Robinson1 XS 6 | Bedrock                                     | Shrubs                      | +34.97%   |
| Robinson2 XS 1 | Unconfined alluvial single ( $\geq$ cobble) | Shrubs and trees            | +39.9%    |
| Robinson2 XS 2 | Unconfined alluvial single ( $\geq$ cobble) | Shrubs                      | +36.87%   |
| Robinson2 XS 3 | Unconfined alluvial single ( $\geq$ cobble) | Shrubs and trees            | +42.12%   |
| Robinson2 XS 4 | Unconfined alluvial single ( $\geq$ cobble) | Shrubs                      | +38.06%   |
| Robinson2 XS 5 | Unconfined alluvial single ( $\geq$ cobble) | Shrubs                      | +36.25%   |
| Robinson2 XS 6 | Unconfined alluvial single ( $\geq$ cobble) | Shrubs                      | +37.15%   |
| Ronnie XS 1    | Unconfined alluvial barform                 | Shrubs, nascent bars        | +37.76%   |
| Ronnie XS 2    | Unconfined alluvial single ( $\geq$ cobble) | Shrubs, trees and sand      | +49.13%   |
| Ronnie XS 3    | Unconfined alluvial single ( $\geq$ cobble) | Shrubs, nascent bars        | +44.03%   |
| Ronnie XS 4    | Unconfined alluvial single ( $\geq$ cobble) | Shrubs, nascent bars        | +54.34 %  |
| Ronnie XS 5    | Unconfined alluvial single ( $\geq$ cobble) | Shrubs                      | +47.74%   |
